# Supplementary material for: Laminins affect T cell trafficking and allograft fate
Source: JCI journal article supplement (doi:10.1172/jci73683), 2014-04-01
Supplement: sd1 [file 1]

**Supplemental Movies:** Distinct patterns of CD4<sup>+</sup> T cells trafficking through immune and tolerant LN are antigen dependent. Naïve mice received  $20 \times 10^6$  alloantigen reactive CD4<sup>+</sup> TEa cells (green) and 2 mg TRITC-70 kDa dextran (vasculature label, red, Movie 1 and 4). Immune (Movie 2 and 5) and tolerant (Movie 3 and 6) mice received CD4<sup>+</sup> TEa cells (green), dextran (vasculature label, red), and  $20 \times 10^6$  alloantigen irrelevant CD4<sup>+</sup> OTII cells (blue). 800 images were captured over ~12 min. Representative movies are depicted 20 minutes (Movie 1, 2 and 3) and 60 minutes (Movie 4, 5 and 6) after cell transfer. 200x.

**A**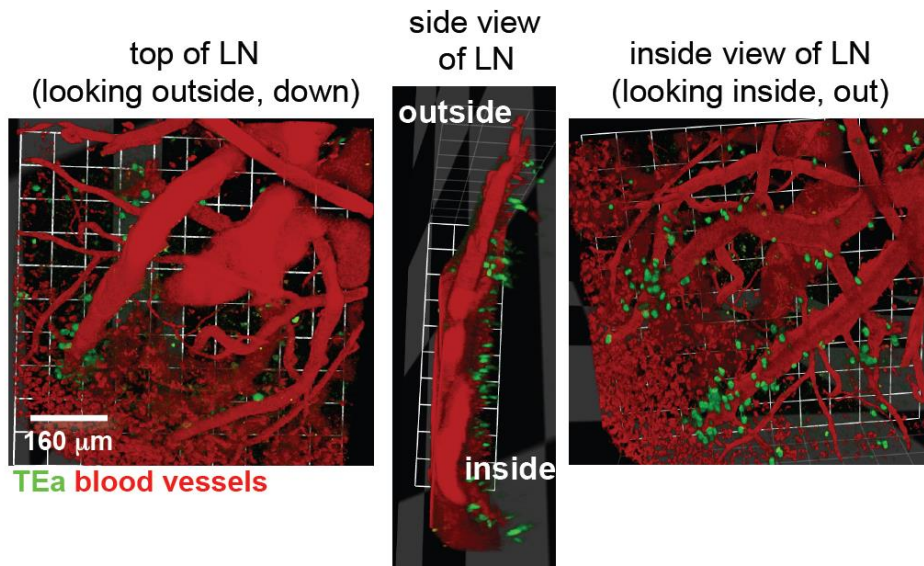**B**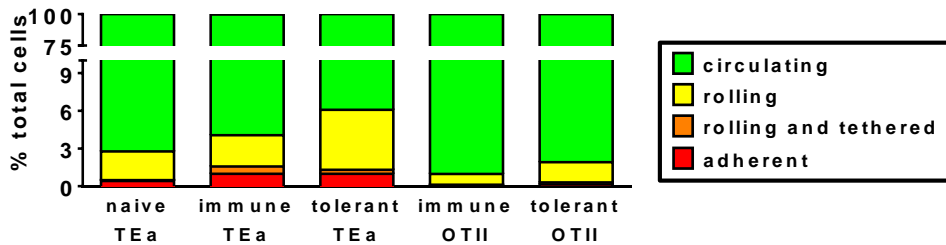

**Supplemental Figure 1.** (A) 3D rendering of LN from tolerized group, 4 hours after transfer, treated as in Figure 1. Images depict transferred CD4<sup>+</sup> antigen specific TEa T cells moving from the HEV down into the medulla of the LN. Top view looking from the outside and top of the LN, down; side view looking at cross-section of the LN; and inside view looking from the inside out of the LN. 200x. (B) Changes in patterns of CD4<sup>+</sup> T cell HEV LN trafficking are antigen dependent. CD4<sup>+</sup> OTII cells labeled with Qtracker 655 (right two bars) and observed circulating through LN 20 min. after co-transfer with CD4<sup>+</sup> TEa cells (left three bars). Data is depicted as the percent of total cells detected in circulation (green), rolling (yellow), rolling and tethered (orange) and adherent (red) as defined in Figure 1. Representative data from one representative time point and experiment of 3 is shown. n.s., not significant.

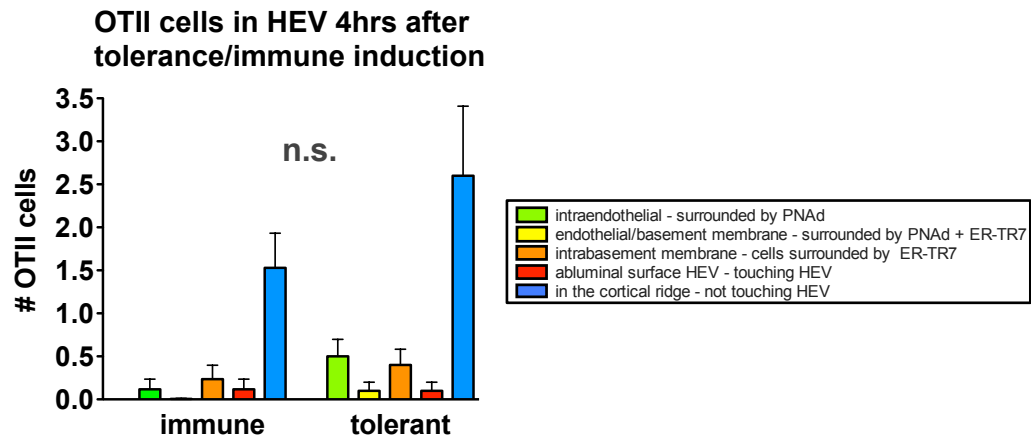

**Supplemental Figure 2.** T cell interaction with HEV is antigen specific. Antigen irrelevant CD4<sup>+</sup> OTII cells transferred to immune or tolerized mice. Recipients euthanized 4 hours after cell transfer. LN harvested, 5  $\mu$ m cryosections analyzed for cell migration and location by fluorescent immunohistochemistry of structures identified by ER-TR7<sup>+</sup> stromal fibers and PNAd<sup>+</sup> HEV. Cells categorized as intraendothelial, within endothelium/basement membrane, within basement membrane, outside HEV, and within cortical ridge as defined in Figure 3. n.s., not significant.

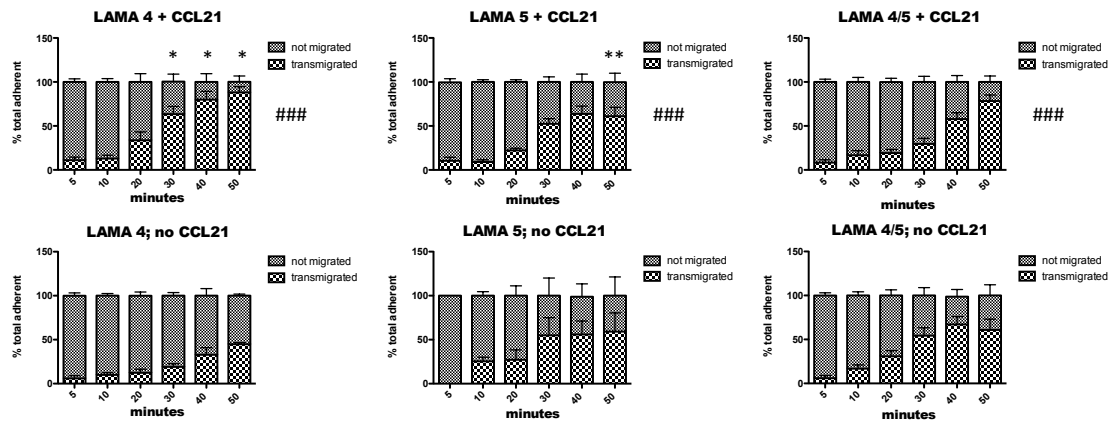

**Supplemental Figure 3.** Percentage of adherent T cells that transmigrated across MS-1 and laminins over a 50 minute imaging period. Laminar flow channels were coated with laminin  $\alpha 4$ , laminin  $\alpha 5$ , or laminin  $\alpha 4/\alpha 5$ , and seeded with mouse endothelial cells (MS-1). Channels were treated with CCL21 to induce transmigration (top graphs); no chemokine was used as a control (bottom graphs). Percentage of total adherent cells that migrated across MS-1 cells represented in the figures. Data presented as mean  $\pm$  SEM.  $n = 4$  replicates per experiment, experiment repeated 3 times. ###  $p < 0.0005$  for a significant effect of treatment over time for the CCL21 groups. \*  $p < 0.05$  for less transmigration in the laminin  $\alpha 4/\alpha 5$  + CCL21 treated channels at 30, 40 and 50 minutes as compared to laminin  $\alpha 4$  + CCL21.  $p < 0.005$  for a higher percentage of transmigrated CD4+ T cells in the laminin  $\alpha 4$  + CCL21 treated channels compared to laminin  $\alpha 5$  + CCL21.

Supplementary Table 1: Anti-laminin antibodies/peptide for in vivo use

| in vivo | Source | Isotype | Reactivity  | Target Molecule   | Route      | [Conc.] | per mouse    | Company           |
|---------|--------|---------|-------------|-------------------|------------|---------|--------------|-------------------|
|         | Rabbit |         | Mouse       | LAMA 4            | f.p.; i.v. | 1 mg/mL | 1 µg; 100 µg | Novus Biologicals |
|         | Rabbit |         | Mouse,Human | LAMA 5            | f.p.; i.v. | 1 mg/mL | 1 µg; 100 µg | Novus Biologicals |
|         |        |         | Mouse       | MMP14-i (peptide) | i.v.       | 3mg     | 100 µg       | Genscript         |

Supplementary Table 2: Primary antibodies for immunohistochemistry

| in vitro | Source      | Isotype         | Clone     | Reactivity   | Target Molecule     | Dilution | Tissue  | Company           |
|----------|-------------|-----------------|-----------|--------------|---------------------|----------|---------|-------------------|
| Primary  | Rat         | IgG2a           | ER-TR7    | Mouse        | ER-TR7              | 1:400    | LN, SPL | BMA Biomedicals   |
|          | Rabbit      | IgG             | ***       | Mouse, Human | LAMA 4              | 1:100    | LN, SPL | Novus Biologicals |
|          | Rabbit      | IgG             | ***       | Mouse, Human | LAMA 5              | 1:100    | LN, SPL | Novus Biologicals |
|          | Goat        | IgG             | ***       | Mouse, Human | Collagen III        | 1:20     | LN      | Southern Biotech  |
|          | Rabbit      | IgG             | ***       | Mouse        | FoxP3               | 1:200    | LN, SPL | abcam             |
|          | Rat         | IgM, $\kappa$   | MECA-79   | Mouse        | PNAd                | 1:100    | LN, SPL | BD Pharmingen     |
|          | Mouse       | IgG2b           | eBio Y-Ae | Mouse        | I-Ab-Ea52-68 (Y-Ae) | 1:50     | LN, SPL | Ebioscience       |
|          | Arm.Hamster | IgG1, lambda2   | HL3       | Mouse        | CD11c               | 1:100    | LN, SPL | BD Pharmingen     |
|          | Rat         | IgG2b, $\kappa$ | eBio927   | Mouse        | PDCA-1              | 1:200    | LN, SPL | Ebioscience       |
|          |             |                 |           |              |                     |          |         |                   |

Supplementary Table 3: Secondary antibodies for immunohistochemistry

| in vitro  | Source | Isotype | Clone | Reactivity  | Target Molecule    | Fluorophore | Dilution | Company                |
|-----------|--------|---------|-------|-------------|--------------------|-------------|----------|------------------------|
| Secondary | Donkey | IgG     | ***   | Rabbit      | IgG(H+L)           | Cy3         | 1:200    | Jackson ImmunoResearch |
|           | Goat   | IgG     | ***   | Arm.Hamster | IgG (H+L)          | Cy5         | 1:400    | Jackson ImmunoResearch |
|           | Goat   | IgG     | ***   | Rabbit      | IgG(H+L)           | Cy5         | 1:200    | Jackson ImmunoResearch |
|           | Donkey | IgG     | ***   | Rat         | IgG(H+L)           | DyLight 488 | 1:400    | Jackson ImmunoResearch |
|           | Goat   | IgG     | ***   | Rat         | IgM ( $\mu$ chain) | DyLight 405 | 1:50     | Jackson ImmunoResearch |
|           | Goat   | IgG     | ***   | Rat         | IgG (H+L)          | Cy5         | 1:200    | Jackson ImmunoResearch |
|           | Goat   | IgG     | ***   | Rat         | IgM ( $\mu$ chain) | Cy5         | 1:400    | Jackson ImmunoResearch |
|           | Donkey | IgG     | ***   | Rat         | IgG(H+L)           | DyLight 405 | 1:50     | Jackson ImmunoResearch |
|           | Donkey | IgG     | ***   | Goat        | IgG(H+L)           | DyLight 488 | 1:400    | Jackson ImmunoResearch |
|           | Goat   | IgG     | ***   | Rat         | IgM ( $\mu$ chain) | FITC        | 1:400    | Jackson ImmunoResearch |
|           | Donkey | IgG     | ***   | Rabbit      | Fab' fragment      |             | 1:100    | Jackson ImmunoResearch |
|           |        |         |       |             | streptavidin       | Cy5         | 1:200    | Jackson ImmunoResearch |
|           |        |         |       |             | streptavidin       | DyLight 405 | 1:50     | Jackson ImmunoResearch |
